# Supplementary material for: Role of Prophylactic Antibiotics in Transperineal Prostate Biopsy: A Systematic Review and Meta-analysis
Source: PubMed Central journal article supplement (PMC8883190; doi:10.1016/j.euros.2022.01.001), 2022-01-29

**FIGURE S1**

Non-Septic Infection Rates after Transperineal Prostate Biopsy (No Antibiotics)

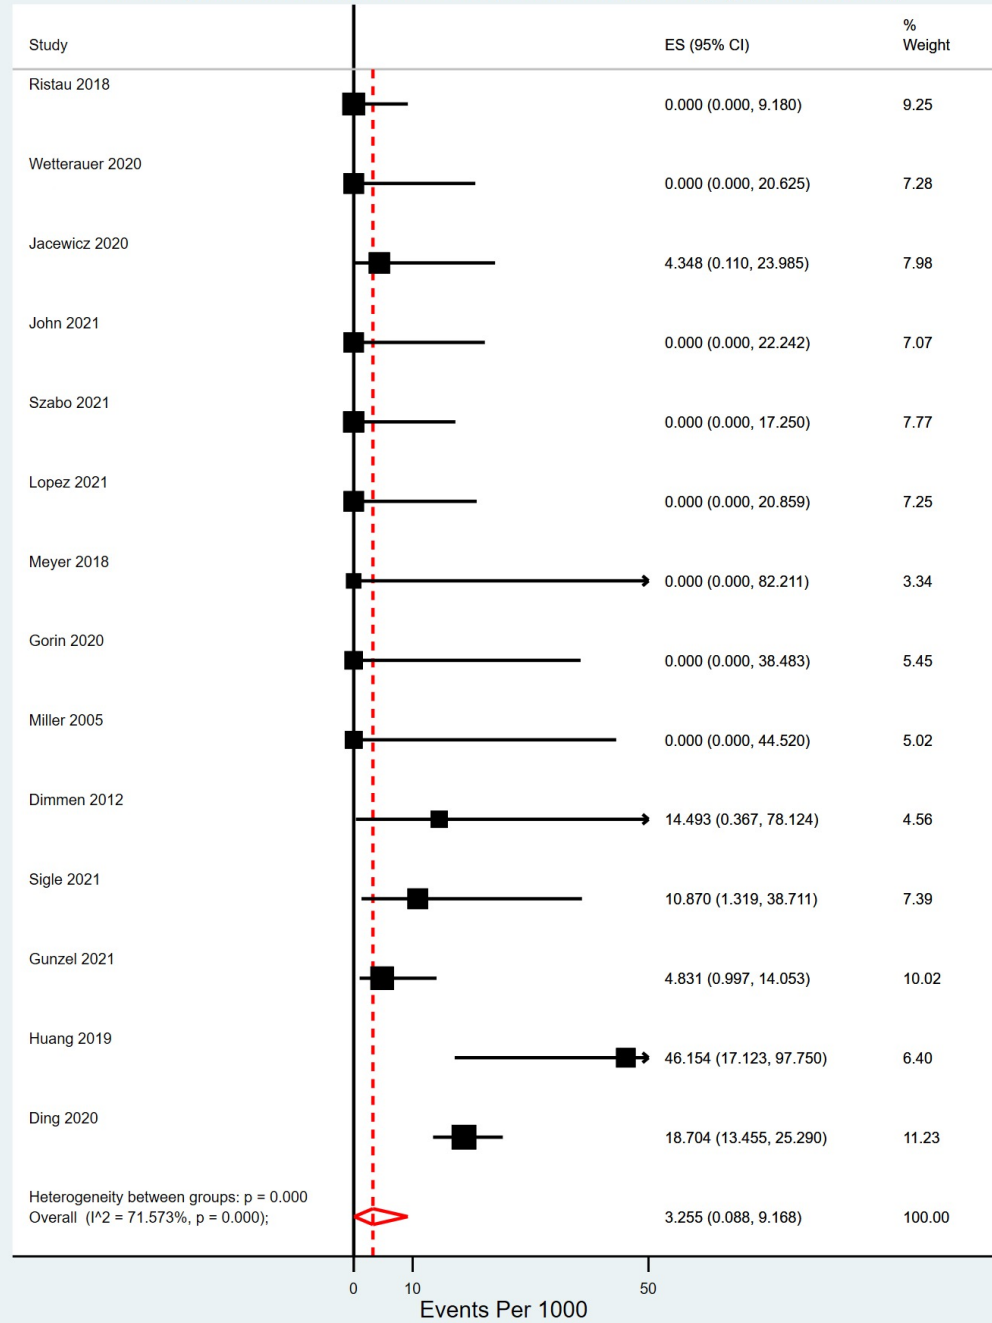

**FIGURE S2**

Overall Infection Rates after Transperineal Prostate Biopsy (No Antibiotics)

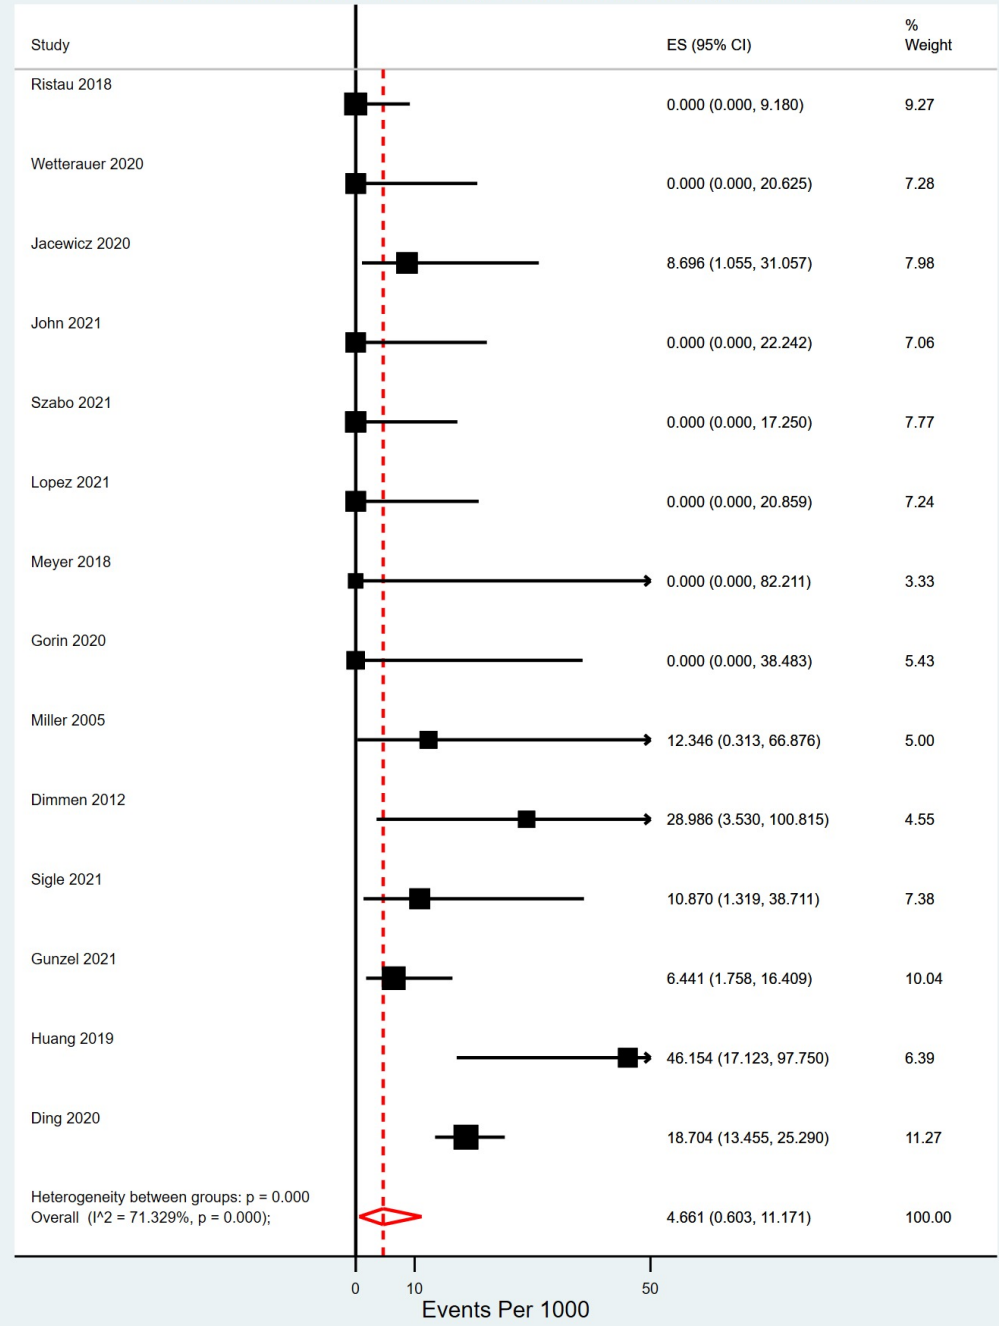

**FIGURE S3**

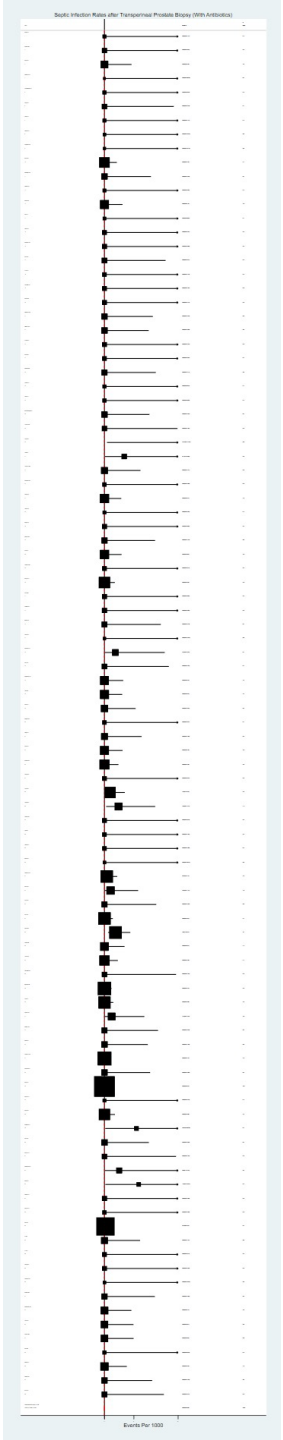

**FIGURE S4**

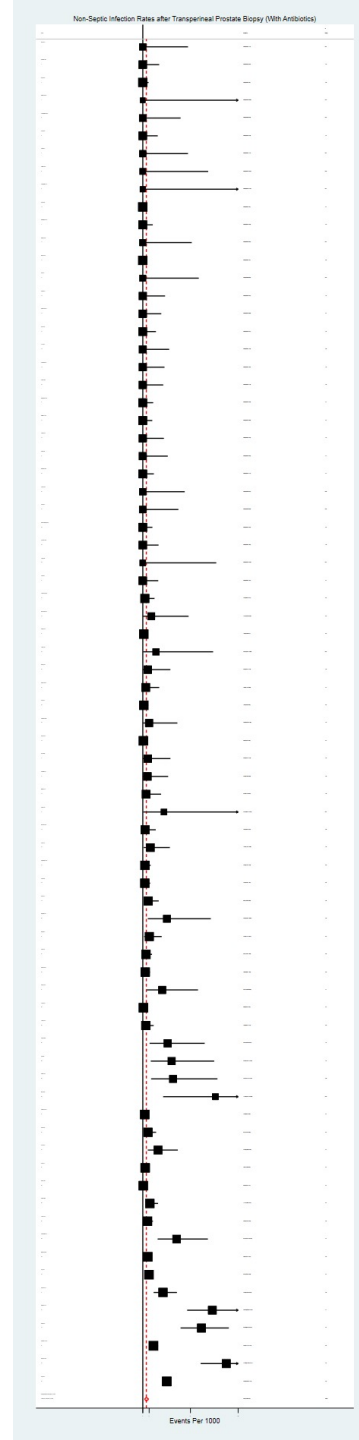

**FIGURE S5**

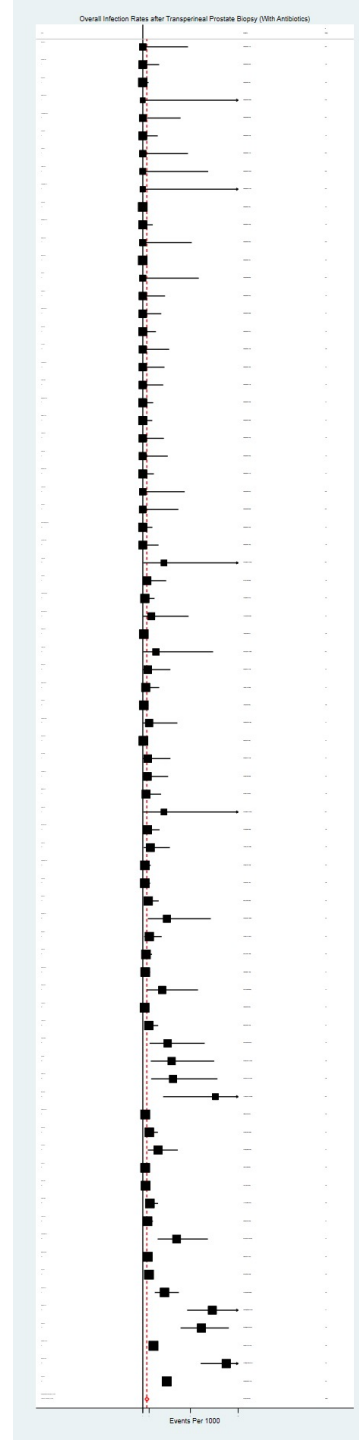

Supplement: mmc2.pdf [file mmc2.pdf]
